# Supplementary material for: High Chili Intake and Cognitive Function among 4582 Adults: An Open Cohort Study over 15 Years
Source: PubMed Central journal article supplement (PMC6566199; doi:10.3390/nu11051183), 2019-05-27

**Figure S1** Prevalence (%) of self-reported poor memory and self-reported memory decline by year and chili intake among Chinese adults aged  $\geq 55$  years and attended at least two waves of cognition tests

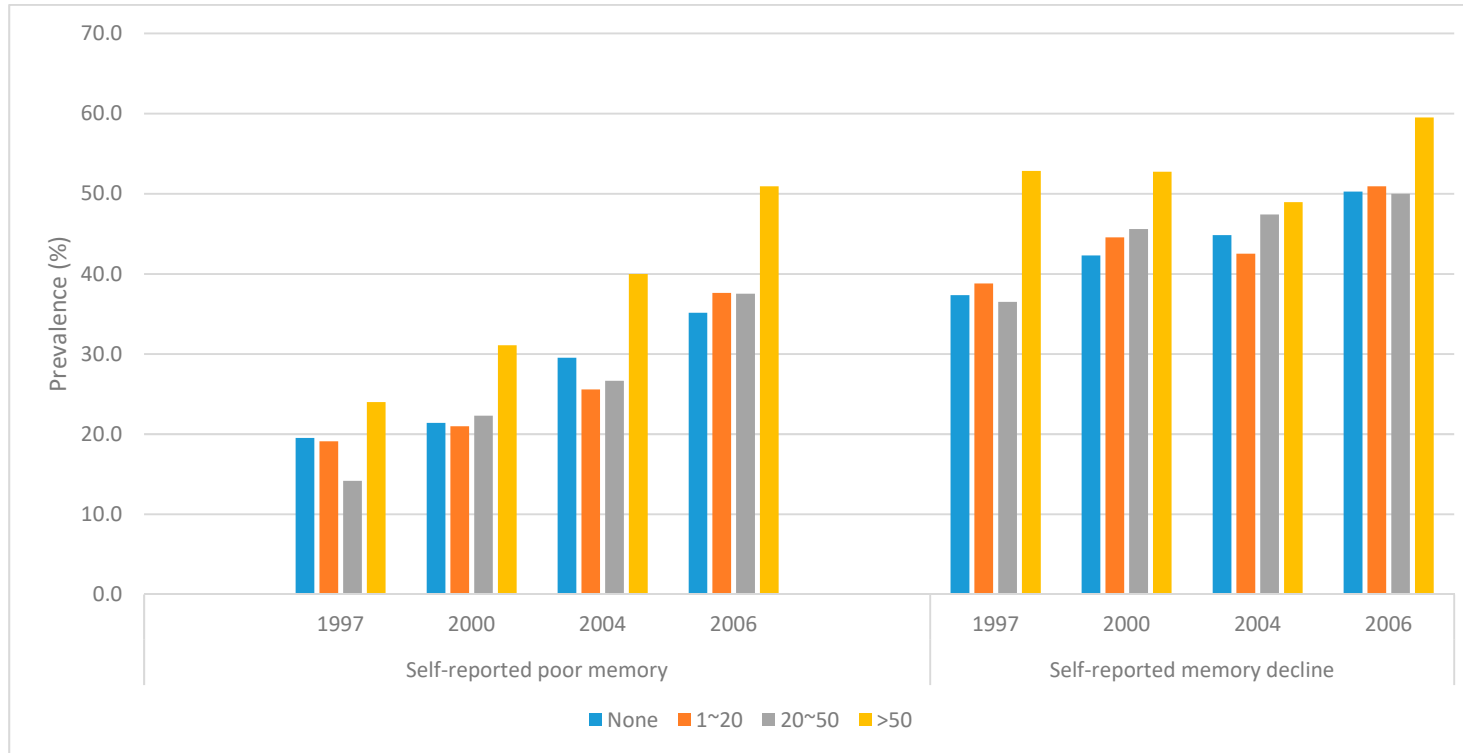

Supplement: nutrients-11-01183-s001.pdf [file nutrients-11-01183-s001.pdf]
